# Supplementary material
Source: publisher site journal article supplement (https://www.kjim.org/upload/media/kjim-2023-350-Supplementary-Fig-1.pdf)

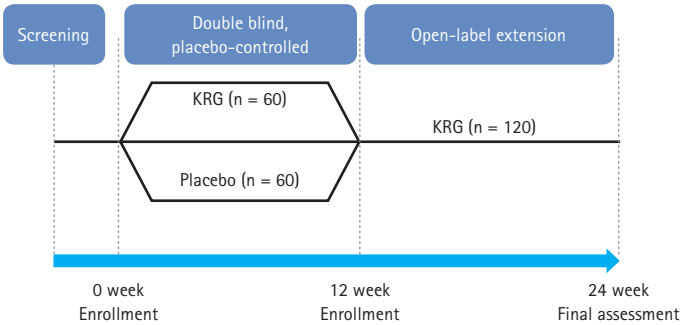

**Supplementary Figure 1.** Study design. KRG, Korean Red Ginseng.

Supplement: Supplementary file 1 [file kjim-2023-350-Supplementary-Fig-1.pdf]
